# Supplementary figures and images for: Proteome Analysis in PAM Cells Reveals That African Swine Fever Virus Can Regulate the Level of Intracellular Polyamines to Facilitate Its Own Replication through ARG1
Source: MDPI journal article supplement (doi:10.3390/v13071236), 2021-06-26

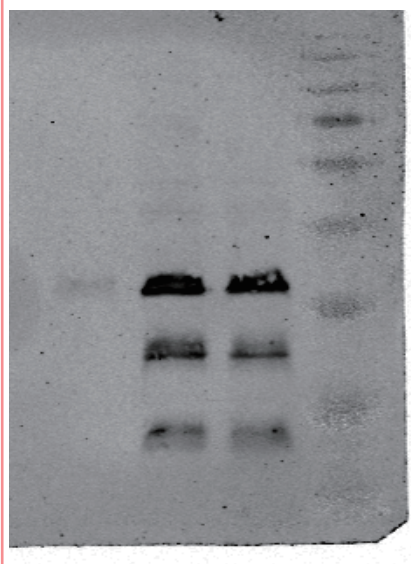

CTSB

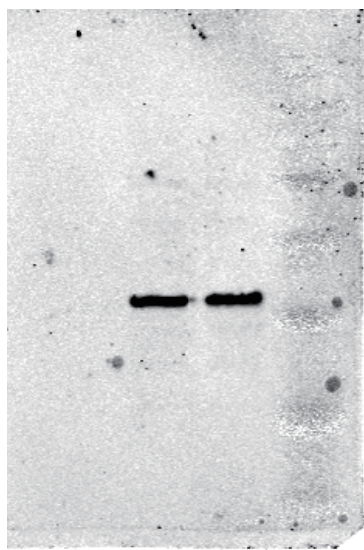

GAPDH

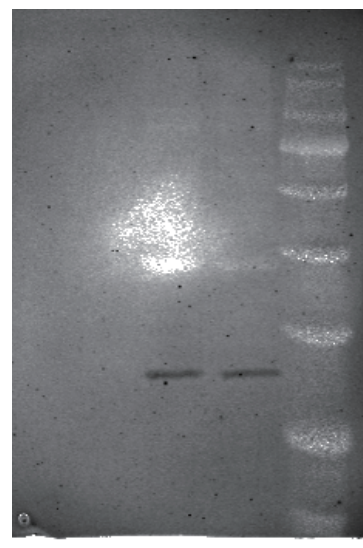

IL-1B

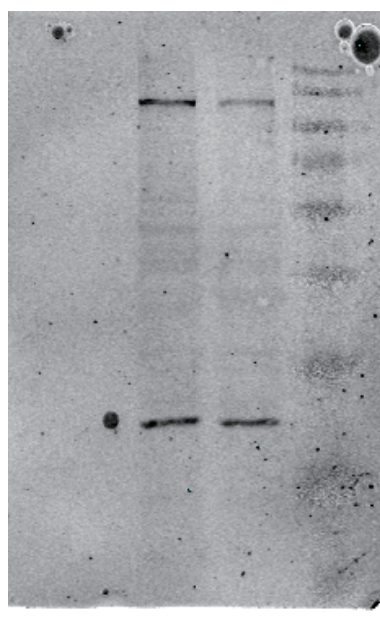

P62

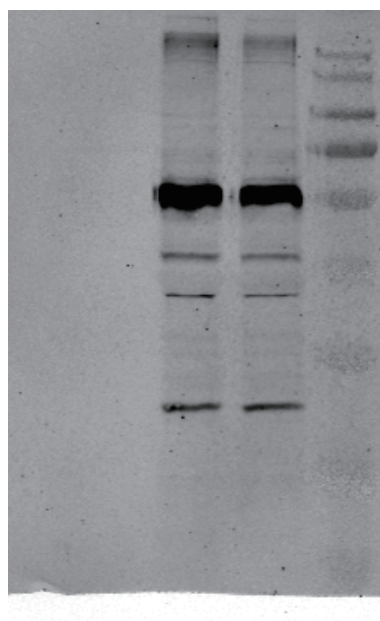

STAT

Figure 3. Western Blot images

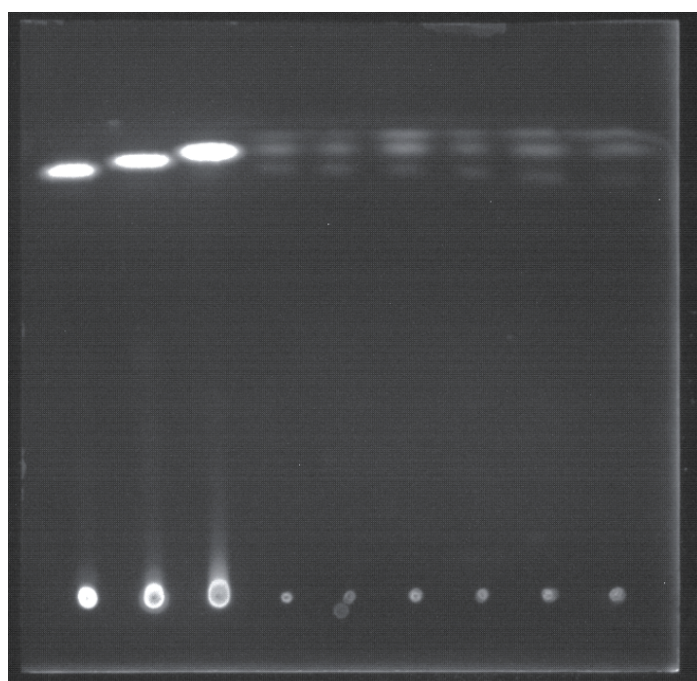

Figure 8. TLC image

Supplement: s1 [file s1]
